# Supplementary material
Source: MDPI journal article supplement (https://www.mdpi.com/2673-4583/12/1/64)
Supplement: s1 [file s1]

Supplementary Materials

# Depolymerization of Heparin Benzyl Ester in a Flow System <sup>†</sup>

Richard T. Taylor \* and Rebecca G. Brunner

Department of Chemistry and Biochemistry, Miami University, Oxford, OH 45056, USA;  
brunnerg@miamioh.edu

\* Correspondence: taylorrt@muohio.edu

<sup>†</sup> Presented at the 26th International Electronic Conference on Synthetic Organic Chemistry, 1–15 November 2022; Available online: <https://sciforum.net/event/ecsoc-26>.

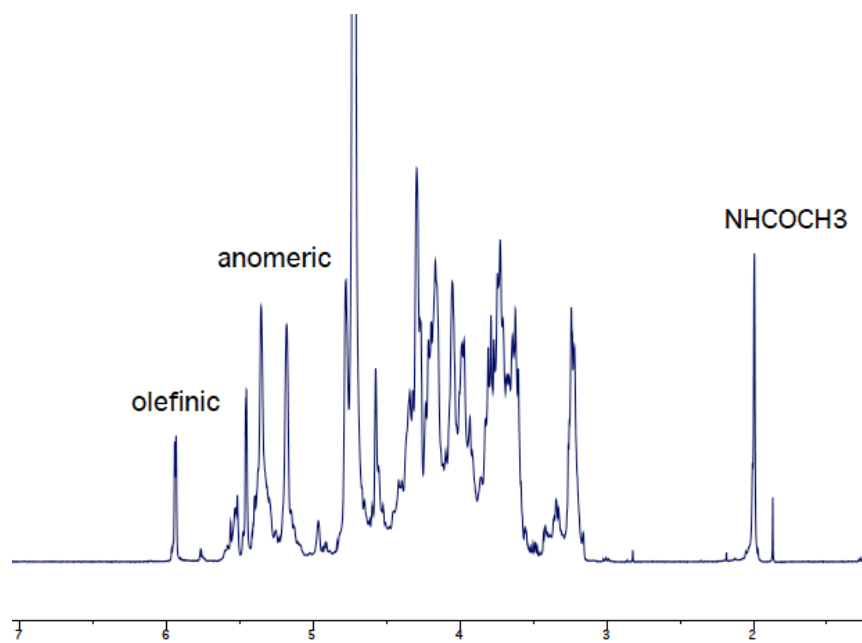

Figure S1. Enoxaparin USP.

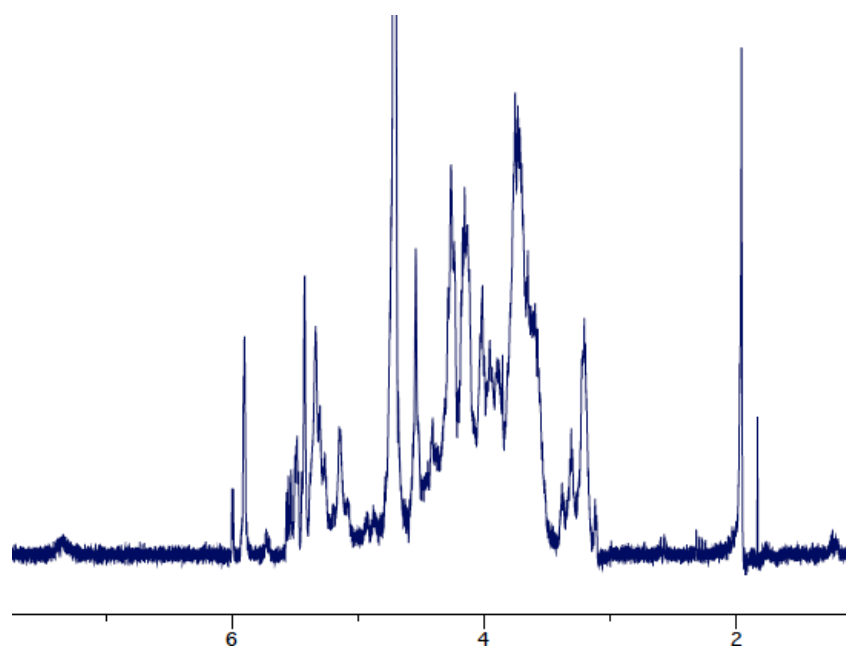

Figure S2. NMR spectrum Entry 5.

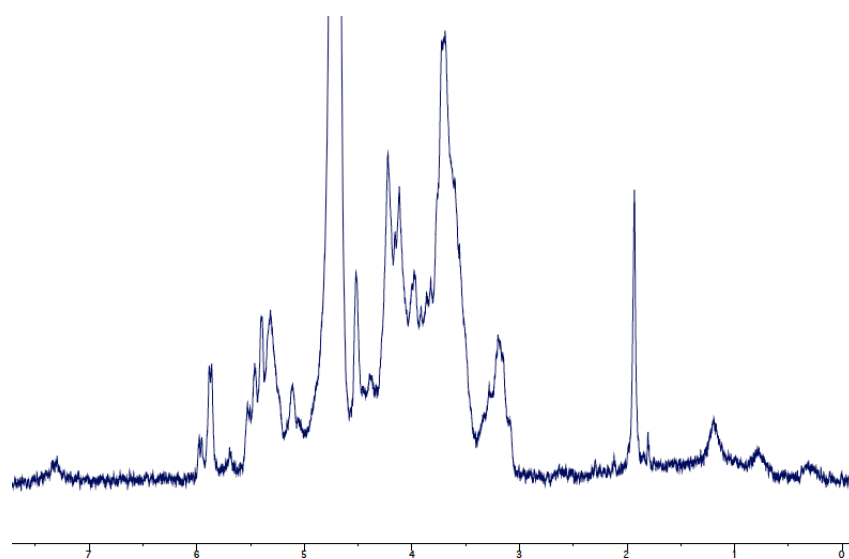

**Figure S3.** NMR spectrum Entry 3.

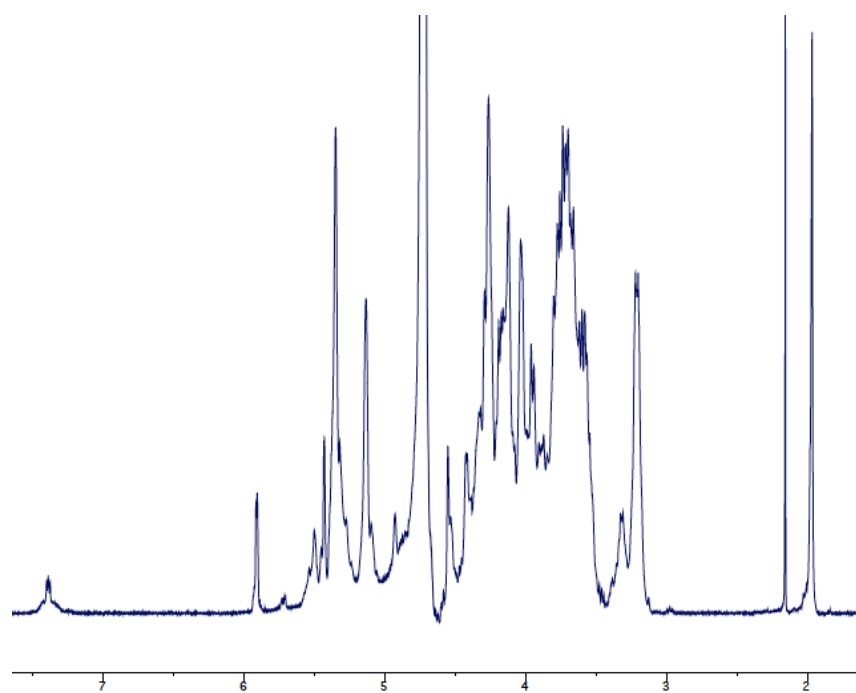

**Figure S4.** NMR spectrum Entry 10.

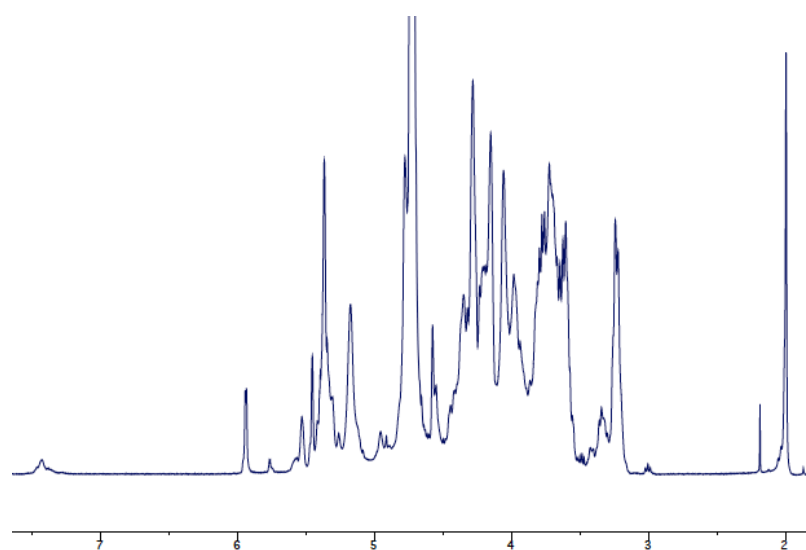

**Figure S5.** NMR spectrum Entry 12.

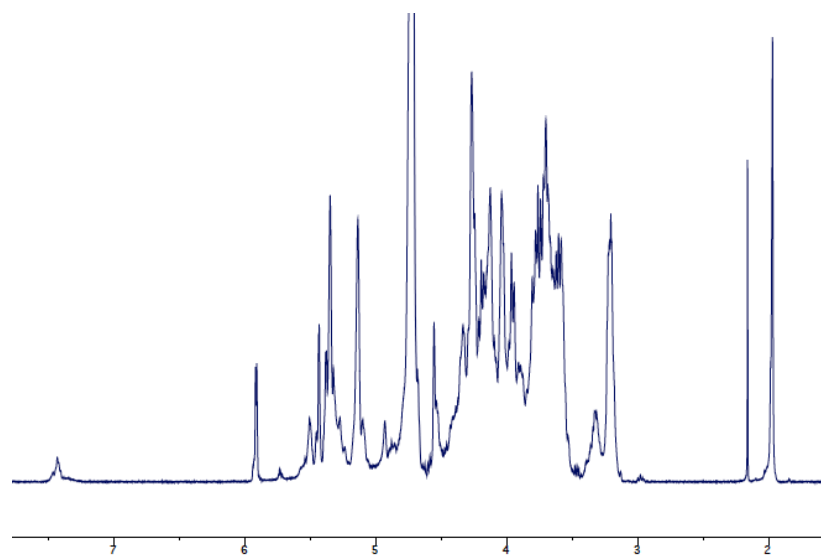

**Figure S6.** NMR spectrum Entry 13.
